# Supplementary material
Source: publisher site journal article supplement (https://www.spandidos-publications.com/7870/downloadSupplementary)
Supplement: Supplementary file 1 [file downloadSupplementary]

## Sheet: Table SVII
Table SVII. Differential expression of genes between EFNA3 mutant and non-mutant groups in AC.
Gene	Cytoband	Altered group	Unaltered group	Altered group	Unaltered group	Log2 Ratio	P-Value	q-Value	Higher expression in
STX5	11q12.3	10.09	9.41	0.13	0.49	0.68	3.35e-8	2.259e-5	Altered group
UBAC2	13q32.3	10.49	10.05	0.09	0.48	0.45	8.05e-8	4.639e-5	Altered group
ATRAID	2p23.3	11.85	11.31	0.14	0.5	0.54	1.988e-6	5.484e-4	Altered group
EIF2B4	2p23.3	9.9	9.28	0.15	0.43	0.63	2.192e-6	5.962e-4	Altered group
RCE1	11q13.2	9.11	7.77	0.32	0.68	1.35	5.966e-6	1.113e-3	Altered group
NPAS2	2q11.2	10.25	8.47	0.51	1.63	1.78	9.295e-6	1.556e-3	Altered group
DDT	22q11.23	11.22	9.66	0.41	0.94	1.57	1.122e-5	1.816e-3	Altered group
UFC1	1q23.3	11.03	10.66	0.1	0.48	0.37	1.163e-5	1.852e-3	Altered group
OPLAH	8q24.3	10.02	8.82	0.34	0.97	1.2	1.198e-5	1.876e-3	Altered group
MEN1	11q13	10.57	9.65	0.27	0.91	0.93	1.304e-5	1.957e-3	Altered group
PITX1	5q31.1	9.65	6.32	0.98	2.92	3.33	1.535e-5	2.226e-3	Altered group
FBXO42	1p36.13	9.28	8.87	0.13	0.4	0.41	2.210e-5	2.810e-3	Altered group
IWS1	2q14.3	10.18	9.39	0.21	0.43	0.79	2.508e-5	3.074e-3	Altered group
ELP4	11p13	8.23	7.61	0.18	0.42	0.62	3.115e-5	3.466e-3	Altered group
DPF2	11q13.1	10	9.62	0.12	0.4	0.38	3.707e-5	3.988e-3	Altered group
PNKD	2q35	10.97	10.32	0.21	0.69	0.65	3.940e-5	4.126e-3	Altered group
BOLA1	1q21.2	9.03	8.19	0.26	0.62	0.83	5.016e-5	4.941e-3	Altered group
BGLAP	1q22	6.95	5.93	0.33	0.91	1.02	5.238e-5	5.103e-3	Altered group
PEX11B	1q21.1	9.94	9.4	0.18	0.42	0.54	6.990e-5	6.250e-3	Altered group
INTS14	15q22.31	9.91	9.51	0.14	0.48	0.4	8.482e-5	7.317e-3	Altered group
ASH1L-AS1	1q22	6.43	4.97	0.46	0.93	1.47	8.544e-5	7.338e-3	Altered group
TGIF2	20q11.23	8.78	7.4	0.46	1.17	1.37	8.849e-5	7.535e-3	Altered group
TRIP4	15q22.31	9.01	8.49	0.18	0.49	0.52	8.960e-5	7.563e-3	Altered group
CTSV	9q22.33	7.5	5.74	0.62	2.01	1.76	1.034e-4	8.435e-3	Altered group
SF3B2	11q13.1	12.43	11.71	0.23	0.41	0.72	1.117e-4	8.895e-3	Altered group
CRKL	22q11.21	10.87	10.45	0.15	0.5	0.41	1.193e-4	9.270e-3	Altered group
HTRA2	2p13.1	9.9	9.25	0.23	0.59	0.65	1.235e-4	9.460e-3	Altered group
AGPS	2q31.2	10.11	9.43	0.22	0.45	0.68	1.260e-4	9.601e-3	Altered group
SSH3	11q13.2	9.26	7.73	0.55	1.48	1.54	1.330e-4	0.01	Altered group
ENTREP3	1q22	11.86	9.46	0.7	0.91	2.4	1.412e-4	0.0104	Altered group
PIP5K1A	1q21.3	10.77	9.88	0.28	0.47	0.89	1.527e-4	0.011	Altered group
FAU	11q13.1	13.39	12.79	0.22	0.74	0.59	1.828e-4	0.0126	Altered group
PRCC	1q23.1	11.15	10.02	0.36	0.51	1.13	2.141e-4	0.0142	Altered group
NXN	17p13.3	10.04	7.71	0.83	1.59	2.33	2.563e-4	0.0164	Altered group
RAB1B	11q13.2	12.43	12.06	0.15	0.41	0.37	3.013e-4	0.0181	Altered group
SSB	2q31.1	11.48	10.86	0.22	0.37	0.62	3.069e-4	0.0183	Altered group
RIC8A	11p15.5	10.94	10.42	0.2	0.46	0.52	3.125e-4	0.0185	Altered group
NAP1L4	11p15.4	11.98	11.24	0.27	0.45	0.74	3.153e-4	0.0185	Altered group
ANKRD13D	11q13.2	10.06	9.08	0.36	0.69	0.98	3.234e-4	0.0188	Altered group
NAGS	17q21.31	6.8	4.3	0.94	1.92	2.5	3.313e-4	0.0191	Altered group
FIGN	2q24.3	6.33	4.49	0.73	1.8	1.85	3.330e-4	0.0191	Altered group
TPGS2	18q12.2	10.08	9.58	0.2	0.6	0.5	3.405e-4	0.0195	Altered group
FAAP20	1p36.33	10.23	8.96	0.44	0.63	1.26	3.516e-4	0.0197	Altered group
PEX14	1p36.22	9.66	8.82	0.3	0.46	0.84	3.771e-4	0.0208	Altered group
PPP1CA	11q13.2	12.31	11.71	0.25	0.6	0.6	4.797e-4	0.0247	Altered group
GRK2	11q13.2	11.35	10.6	0.29	0.55	0.75	4.910e-4	0.0251	Altered group
RNF25	2q35	9.74	9.1	0.26	0.6	0.64	4.951e-4	0.0252	Altered group
PRORSD1P	2p16.1	5.46	4.43	0.4	0.7	1.03	5.352e-4	0.0261	Altered group
LHX2	9q33.3	4.92	2.45	1.03	2.38	2.47	5.822e-4	0.0279	Altered group
ORC4	2q23.1	9.32	8.77	0.22	0.4	0.56	5.874e-4	0.0281	Altered group
GTF3C2	2p23.3	10.3	9.79	0.21	0.4	0.51	6.114e-4	0.0287	Altered group
PPP2R1B	11q23.1	9.95	8.83	0.46	0.87	1.12	6.507e-4	0.0298	Altered group
SF1	11q13.1	11.88	11.59	0.13	0.27	0.3	6.597e-4	0.0301	Altered group
SPG21	15q22.31	11.31	10.88	0.19	0.49	0.43	6.618e-4	0.0301	Altered group
PFDN2	1q23.3	10.89	9.99	0.38	0.79	0.9	6.780e-4	0.0304	Altered group
DENND2D	1p13.3-p13.2	8.88	7.84	0.45	1.19	1.04	7.035e-4	0.031	Altered group
COA3	17q21.2	10.36	9.79	0.25	0.76	0.57	7.083e-4	0.031	Altered group
JPT2	16p13.3	11.2	10.29	0.38	0.74	0.91	7.761e-4	0.0335	Altered group
ATP6V1B1	2p13.3	5.5	3.25	0.96	1.94	2.24	7.834e-4	0.0336	Altered group
LINC00623	1p11.2	8.99	8.26	0.32	0.89	0.73	7.836e-4	0.0336	Altered group
HAUS8	19p13.11	7.89	7.18	0.29	1.2	0.7	8.129e-4	0.0345	Altered group
MAP3K9	14q24.2	5.82	5.16	0.19	1.43	0.66	8.229e-4	0.0348	Altered group
OIP5-AS1	15q15.1	9.69	8.57	0.47	0.84	1.12	8.397e-4	0.0352	Altered group
AUP1	2p13.1	12.41	11.52	0.38	0.68	0.89	8.429e-4	0.0352	Altered group
MSH6	2p16.3	11.14	10.44	0.31	0.74	0.7	9.158e-4	0.0373	Altered group
RIT1	1q22	9.62	8.62	0.42	0.63	1	9.617e-4	0.0387	Altered group
SLC50A1	1q22	11.53	9.61	0.78	1.04	1.92	9.819e-4	0.0392	Altered group
CAMTA1	1p36.31-p36.23	10.02	9.11	0.39	0.62	0.92	1.012e-3	0.0399	Altered group
FKBP3	14q21.2	11.09	10.43	0.29	0.64	0.66	1.021e-3	0.0401	Altered group
RPL32	3p25.2	14.18	13.63	0.25	0.75	0.55	1.070e-3	0.0415	Altered group
USP34	2p15	11.17	10.53	0.28	0.48	0.64	1.098e-3	0.0419	Altered group
ABI2	2q33.2	10.55	9.79	0.33	0.57	0.76	1.115e-3	0.0424	Altered group
SUMO1P3	1q23.2	7.94	7.4	0.24	0.48	0.54	1.145e-3	0.043	Altered group
DGUOK	2p13.1	10.51	9.93	0.27	0.7	0.59	1.196e-3	0.0443	Altered group
SCAMP3	1q22	12.3	10.88	0.58	0.63	1.42	1.223e-3	0.0448	Altered group
ERCC3	2q14.3	10.12	9.75	0.17	0.33	0.37	1.246e-3	0.0454	Altered group
KLC2	11q13.2	10.05	9.35	0.32	0.73	0.69	1.248e-3	0.0454	Altered group
TMEM123	11q22.2	12.04	11.17	0.39	0.76	0.87	1.252e-3	0.0454	Altered group
CCT7	2p13.2	13.01	12.56	0.21	0.49	0.45	1.293e-3	0.0465	Altered group
SART1	11q13.1	10.95	10.35	0.27	0.46	0.6	1.301e-3	0.0465	Altered group
FLVCR1-DT	1q32.3	5.6	4.24	0.64	1.44	1.37	1.366e-3	0.0483	Altered group
INPPL1	11q13.4	11.78	11.04	0.33	0.5	0.74	1.374e-3	0.0485	Altered group
GGPS1	1q42.3	10.2	9.7	0.23	0.43	0.49	1.380e-3	0.0485	Altered group
CASZ1	1p36.22	8.17	5.96	0.97	1.38	2.21	1.380e-3	0.0485	Altered group
TM6SF2	19p13.11	4.06	1.58	1.1	1.63	2.49	1.385e-3	0.0486	Altered group
MAP3K11	11q13.1	10.81	10.37	0.2	0.46	0.43	1.394e-3	0.0488	Altered group
TSTD1	1q23.3	8.95	6.84	1	2.72	2.11	1.422e-3	0.0495	Altered group
SDHAF2	11q12.2	10.04	9.46	0.26	0.44	0.58	1.427e-3	0.0496	Altered group
EMC9	14q12	9.21	8.66	0.26	0.81	0.55	1.437e-3	0.0498	Altered group
TRIM61	4q32.3	0.18	4.02	0.28	2.42	-3.83	7.54e-19	1.48e-14	Unaltered group
C6	5p13.1	0.25	3.38	0.39	2.63	-3.13	3.23e-12	1.58e-8	Unaltered group
CYP3A4	7q22.1	0.57	4.75	0.54	3.68	-4.18	1.18e-11	4.63e-8	Unaltered group
TMEM233	12q24.23	1.64	3.64	0.3	1.83	-1.99	2.08e-10	3.40e-7	Unaltered group
ABCA13	7p12.3	0.45	2.66	0.23	2.37	-2.21	2.50e-10	3.59e-7	Unaltered group
ZNF432	19q13.41	5.62	7.21	0.25	1.07	-1.59	2.57e-10	3.59e-7	Unaltered group
XKR3	22q11.1	0.16	2.82	0.38	2.59	-2.66	2.89e-10	3.77e-7	Unaltered group
CHRNA6	8p11.21	0.09	2.39	0.22	2.6	-2.3	7.78e-10	8.90e-7	Unaltered group
GABRG1	4p12	0.19	3.03	0.3	3.18	-2.84	8.18e-10	8.90e-7	Unaltered group
CDKL5	Xp22.13	1.5	2.99	0.18	1.68	-1.49	1.87e-9	1.925e-6	Unaltered group
MYOZ2	4q26	0.4	2.42	0.31	2.2	-2.02	4.50e-9	4.410e-6	Unaltered group
DNALI1	1p34.3	3.18	6.49	0.6	2.21	-3.31	8.00e-9	7.118e-6	Unaltered group
ZNF211	19q13.4	7.33	8.28	0.18	0.77	-0.95	8.89e-9	7.567e-6	Unaltered group
MAGEE2	Xq13.3	0.17	2.33	0.42	1.94	-2.16	1.94e-8	1.585e-5	Unaltered group
PRLR	5p13.2	4.12	10.36	1.05	3.01	-6.24	2.26e-8	1.772e-5	Unaltered group
GLYATL1	11q12.1	0.12	1.67	0.28	1.73	-1.56	2.84e-8	2.139e-5	Unaltered group
CCDC92	12q24.31	9.18	9.94	0.16	0.72	-0.75	5.96e-8	3.645e-5	Unaltered group
PLCXD3	5p13.1	2.56	7.46	1.02	3.46	-4.9	1.09e-7	5.736e-5	Unaltered group
ZNF417	19q13.43	5.47	6.86	0.25	0.68	-1.38	1.11e-7	5.736e-5	Unaltered group
TRPM8	2q37.1	0.18	1.46	0.28	1.23	-1.29	1.18e-7	5.948e-5	Unaltered group
BPIFA2	20q11.21	0.35	2.3	0.4	2.16	-1.95	1.27e-7	6.237e-5	Unaltered group
SYT10	12p11.1	0.09	1.69	0.23	2.11	-1.59	1.31e-7	6.239e-5	Unaltered group
STEAP4	7q21.12	5.78	8.34	0.57	2.24	-2.57	1.73e-7	7.863e-5	Unaltered group
PTPRR	12q15	0.52	2.67	0.48	2.12	-2.15	2.11e-7	9.181e-5	Unaltered group
CREBRF	5q35.1	7.2	8.16	0.19	1.15	-0.96	2.40e-7	1.023e-4	Unaltered group
BNC2	9p22.3-p22.2	2.98	5.7	0.59	1.75	-2.72	4.28e-7	1.712e-4	Unaltered group
UPP2	2q24.1	0.12	1.33	0.28	1.32	-1.22	5.20e-7	1.998e-4	Unaltered group
ZNF676	19p12	0.56	3.11	0.6	2.53	-2.55	5.34e-7	2.011e-4	Unaltered group
PCDHGA5	5q31	1.77	4.28	0.55	1.59	-2.51	5.56e-7	2.054e-4	Unaltered group
APOLD1	12p13.1	8.38	9.61	0.3	1.12	-1.23	9.10e-7	3.241e-4	Unaltered group
ITGAD	16p11.2	0.18	1.43	0.28	1.58	-1.25	1.038e-6	3.631e-4	Unaltered group
ZNF565	19q13.12	5.29	5.96	0.17	0.64	-0.67	1.152e-6	3.959e-4	Unaltered group
SEMG1	20q13.12	0.56	4.2	0.9	3.94	-3.64	1.181e-6	3.987e-4	Unaltered group
SOX2	3q26.33	0.08	1.15	0.19	1.54	-1.07	1.302e-6	4.180e-4	Unaltered group
GALNTL6	4q34.1	0.08	1.06	0.19	1.39	-0.98	1.631e-6	4.956e-4	Unaltered group
ZNF529	19q13.12	7.82	8.63	0.2	0.68	-0.81	1.645e-6	4.956e-4	Unaltered group
GORAB	1q24.2	7.06	7.97	0.22	0.65	-0.91	1.782e-6	5.189e-4	Unaltered group
RAPGEF6	5q31.1	5.73	6.95	0.31	1.42	-1.22	1.802e-6	5.189e-4	Unaltered group
CHRDL1	Xq23	0.28	2.27	0.5	2.26	-1.98	1.841e-6	5.224e-4	Unaltered group
MSX2P1	17q22	0.08	0.87	0.19	0.99	-0.8	1.920e-6	5.370e-4	Unaltered group
PCSK2	20p12.1	0.56	2.84	0.55	2.85	-2.27	2.351e-6	6.221e-4	Unaltered group
SCGN	6p22.2	0.64	3.53	0.74	2.37	-2.89	2.566e-6	6.612e-4	Unaltered group
ZNF841	19q13.41	6.68	7.95	0.31	0.8	-1.28	2.857e-6	7.267e-4	Unaltered group
NLGN4X	Xp22.32-p22.31	1.36	3.97	0.65	1.83	-2.61	2.990e-6	7.508e-4	Unaltered group
SLC40A1	2q32.2	9.67	11.26	0.4	2	-1.59	3.120e-6	7.734e-4	Unaltered group
USP49	6p21.1	2.49	3.5	0.27	1.05	-1.01	3.390e-6	8.299e-4	Unaltered group
LIMA1	12q13.12	8.3	9.92	0.39	0.96	-1.62	3.689e-6	8.692e-4	Unaltered group
SPAG17	1p12	0.41	3.31	0.77	2.42	-2.9	3.728e-6	8.692e-4	Unaltered group
PSG5	19q13.31	0.21	1.52	0.32	1.76	-1.31	4.429e-6	9.414e-4	Unaltered group
GABRP	5q35.1	0.1	1.02	0.25	0.85	-0.92	4.471e-6	9.414e-4	Unaltered group
NLGN1	3q26.31	0.44	1.78	0.35	1.62	-1.34	4.527e-6	9.431e-4	Unaltered group
DNAI7	12p12.1	2.66	4.61	0.51	1.45	-1.94	4.897e-6	9.996e-4	Unaltered group
NRXN3	14q24.3-q31.1	1.5	4.43	0.77	2.21	-2.93	4.900e-6	9.996e-4	Unaltered group
FAT3	11q14.3	0.33	3.3	0.8	2.46	-2.97	4.988e-6	1.007e-3	Unaltered group
MITF	3p13	4.96	6.93	0.5	1.28	-1.97	5.287e-6	1.034e-3	Unaltered group
CCL21	9p13.3	0.77	3.86	0.85	3.29	-3.09	5.353e-6	1.034e-3	Unaltered group
UOX	1p31.1	0.22	2.24	0.55	1.69	-2.02	5.831e-6	1.102e-3	Unaltered group
GPR182	12q13.3	0.35	1.8	0.4	1.66	-1.45	6.485e-6	1.198e-3	Unaltered group
CES2	16q22.1	10.71	11.96	0.35	1.15	-1.25	8.582e-6	1.481e-3	Unaltered group
AGBL3	7q33	1.11	2.92	0.48	1.2	-1.8	8.778e-6	1.495e-3	Unaltered group
USP9X	Xp11.4	11.44	11.95	0.15	0.51	-0.51	9.831e-6	1.618e-3	Unaltered group
BEX5	Xq22.1	3.08	5.29	0.64	2.24	-2.21	1.017e-5	1.659e-3	Unaltered group
AZGP1	7q22.1	0.39	1.55	0.31	1.62	-1.16	1.139e-5	1.829e-3	Unaltered group
FHIP2A	10q25.3	8.81	9.64	0.23	0.61	-0.83	1.193e-5	1.876e-3	Unaltered group
BMP2K	4q21.21	5.84	7.31	0.43	1.29	-1.48	1.212e-5	1.884e-3	Unaltered group
LRRIQ1	12q21.31	0.44	2.19	0.51	1.99	-1.75	1.235e-5	1.904e-3	Unaltered group
UGT2A3	4q13.2	0.1	1.62	0.25	2.55	-1.52	1.304e-5	1.957e-3	Unaltered group
CBLN4	20q13.2	1	3.82	0.83	2.65	-2.82	1.309e-5	1.957e-3	Unaltered group
DPP6	7q36.2	0.36	1.92	0.42	2.21	-1.57	1.327e-5	1.969e-3	Unaltered group
SELENOP	5p12	11.27	12.27	0.27	1.4	-0.99	1.500e-5	2.192e-3	Unaltered group
FAM221A	7p15.3	4.41	5.82	0.4	1.05	-1.41	1.591e-5	2.280e-3	Unaltered group
BEST3	12q15	0.85	3.76	0.8	1.89	-2.9	1.595e-5	2.280e-3	Unaltered group
TMEM267	5p12	7.16	8.39	0.32	0.65	-1.23	1.659e-5	2.355e-3	Unaltered group
EPHB1	3q22.2	2.62	6.32	1.03	2.46	-3.71	1.758e-5	2.477e-3	Unaltered group
GPR4	19q13.32	7.44	8.59	0.35	1.38	-1.16	1.815e-5	2.521e-3	Unaltered group
STAT6	12q13.3	11.23	12.31	0.32	0.94	-1.08	1.942e-5	2.679e-3	Unaltered group
ADH4	4q23	0.09	1.71	0.22	2.85	-1.62	2.049e-5	2.735e-3	Unaltered group
LINC02913	9q34.11	0.08	0.74	0.19	0.89	-0.66	2.053e-5	2.735e-3	Unaltered group
PKD2L2	5q31.2	0.18	1.13	0.28	0.77	-0.94	2.096e-5	2.748e-3	Unaltered group
GUCY1A2	11q22.3	1.56	4.25	0.71	1.43	-2.68	2.109e-5	2.748e-3	Unaltered group
C10ORF105	10q22.1	1.15	3.94	0.85	2.52	-2.79	2.119e-5	2.748e-3	Unaltered group
MAN2A1	5q21.3	7.93	9.35	0.44	1.45	-1.43	2.119e-5	2.748e-3	Unaltered group
ZNF98	19p12	0.18	1.66	0.45	1.5	-1.47	2.182e-5	2.805e-3	Unaltered group
LTF	3p21.31	1.04	3.1	0.64	2.09	-2.07	2.248e-5	2.840e-3	Unaltered group
PNLIPRP3	10q25.3	0.93	3.95	0.93	2.99	-3.01	2.383e-5	2.972e-3	Unaltered group
PCDHB19P	5q31.3	1.12	3.51	0.64	1.26	-2.39	2.676e-5	3.171e-3	Unaltered group
SYNPO2	4q26	5.46	7.76	0.68	1.66	-2.31	2.679e-5	3.171e-3	Unaltered group
LCN6	9q34.3	0.09	0.95	0.23	1.31	-0.86	2.699e-5	3.171e-3	Unaltered group
WRN	8p12	7.1	7.88	0.24	0.67	-0.78	2.704e-5	3.171e-3	Unaltered group
SHISA3	4p13	2.29	5.77	1.02	2.42	-3.48	2.756e-5	3.212e-3	Unaltered group
PGGT1B	5q22.3	8.61	9.2	0.18	0.49	-0.59	2.844e-5	3.272e-3	Unaltered group
MROH7	1p32.3	1.55	5.14	1.08	2.82	-3.59	2.882e-5	3.272e-3	Unaltered group
NSMAF	8q12.1	9.05	9.65	0.19	0.58	-0.6	2.886e-5	3.272e-3	Unaltered group
ZNF350	19q13.41	7.16	7.83	0.2	0.52	-0.68	2.890e-5	3.272e-3	Unaltered group
DNM1L	12p11.21	10.36	10.87	0.16	0.44	-0.51	3.006e-5	3.364e-3	Unaltered group
RBM41	Xq22.3	5.99	6.8	0.26	0.86	-0.81	3.299e-5	3.630e-3	Unaltered group
CNTN3	3p12.3	0.35	2.12	0.54	2.47	-1.78	3.497e-5	3.797e-3	Unaltered group
SUCNR1	3q25.1	0.57	3.37	0.9	2.81	-2.8	3.858e-5	4.126e-3	Unaltered group
MANCR	10p15.1	1.14	3.63	0.8	2.34	-2.49	3.914e-5	4.126e-3	Unaltered group
PCDHAC1	5q31.3	0.92	3.32	0.76	2.13	-2.4	3.921e-5	4.126e-3	Unaltered group
MAPK9	5q35.3	9.73	10.5	0.24	0.62	-0.78	4.025e-5	4.170e-3	Unaltered group
TIGD4	4q31.3	1.56	3.79	0.67	1.46	-2.24	4.493e-5	4.559e-3	Unaltered group
PPARGC1B	5q32	2.79	4.49	0.52	1.19	-1.7	4.718e-5	4.763e-3	Unaltered group
TRPA1	8q21.11	0.19	1.15	0.29	1.46	-0.96	4.944e-5	4.940e-3	Unaltered group
RGS8	1q25.3	0.08	1.03	0.19	1.7	-0.95	4.973e-5	4.941e-3	Unaltered group
SLC11A2	12q13.12	9.32	10.27	0.31	0.94	-0.95	5.021e-5	4.941e-3	Unaltered group
LRRC55	11q12.1	0.34	2.36	0.62	1.39	-2.02	5.283e-5	5.122e-3	Unaltered group
CPNE4	3q22.1	1.45	5.34	1.27	3.46	-3.89	5.399e-5	5.209e-3	Unaltered group
TRIML2	4q35.2	0.35	1.62	0.43	1.4	-1.27	5.582e-5	5.358e-3	Unaltered group
PRND	20p13	0.33	1.98	0.54	2.05	-1.65	5.625e-5	5.373e-3	Unaltered group
MOSMO	16p12.2	8.43	9.03	0.2	0.58	-0.59	5.676e-5	5.396e-3	Unaltered group
HRH2	5q35.2	1.13	2.84	0.57	1.63	-1.71	5.763e-5	5.426e-3	Unaltered group
DNMBP-AS1	10q24.2	0.1	0.84	0.25	0.85	-0.74	6.396e-5	5.953e-3	Unaltered group
PEX5L	3q26.33	0.45	1.74	0.43	1.26	-1.28	6.415e-5	5.953e-3	Unaltered group
PAQR3	4q21.21	6.77	7.87	0.37	1.01	-1.1	6.474e-5	5.980e-3	Unaltered group
FNIP1	5q31.1	8.88	10.09	0.37	0.73	-1.21	6.740e-5	6.079e-3	Unaltered group
KGD4	5q13.2	9.26	9.75	0.16	0.6	-0.49	6.746e-5	6.079e-3	Unaltered group
NAPA	19q13.33	12.35	13.12	0.25	0.65	-0.77	6.767e-5	6.079e-3	Unaltered group
CLINT1	5q33.3	10.29	11	0.24	0.74	-0.71	7.226e-5	6.432e-3	Unaltered group
AR	Xq12	0.72	3.42	0.91	2.48	-2.7	7.502e-5	6.618e-3	Unaltered group
CHST4	16q22.2	1.14	4.7	1.16	2.63	-3.56	8.046e-5	7.035e-3	Unaltered group
SPATA9	5q15	1.94	3.4	0.46	0.94	-1.46	8.289e-5	7.214e-3	Unaltered group
HEBP1	12p13.1	10.27	11.54	0.41	0.89	-1.27	8.333e-5	7.221e-3	Unaltered group
KDM3B	5q31.2	10.65	11.24	0.21	0.58	-0.6	8.814e-5	7.535e-3	Unaltered group
GADL1	3p24.1-p23	0.29	1.61	0.46	1.57	-1.32	8.909e-5	7.552e-3	Unaltered group
NKAIN2	6q22.31	0.52	1.98	0.51	1.58	-1.46	9.141e-5	7.618e-3	Unaltered group
TRIM56	7q22.1	6.44	7.71	0.43	1.09	-1.26	9.419e-5	7.816e-3	Unaltered group
RB1CC1	8q11.23	9.83	10.35	0.18	0.55	-0.51	9.560e-5	7.899e-3	Unaltered group
ZNF761	19q13.42	7.18	8.45	0.4	0.73	-1.27	1.028e-4	8.422e-3	Unaltered group
KCNJ16	17q24.3	0.85	2.87	0.69	2.82	-2.02	1.051e-4	8.471e-3	Unaltered group
TMEM263	12q23.3	10.2	10.82	0.22	0.63	-0.62	1.057e-4	8.483e-3	Unaltered group
EEF2K	16p12.2	9.26	10.08	0.29	0.77	-0.82	1.106e-4	8.839e-3	Unaltered group
RTL9	Xq23	1.36	4.1	0.93	2.16	-2.75	1.134e-4	8.993e-3	Unaltered group
ALPK1	4q25	7.51	8.57	0.36	0.81	-1.06	1.179e-4	9.231e-3	Unaltered group
NLRP7	19q13.42	0.09	0.82	0.22	1.25	-0.73	1.183e-4	9.231e-3	Unaltered group
IDO2	8p11.21	0.25	1.97	0.6	1.5	-1.73	1.214e-4	9.375e-3	Unaltered group
AKR1D1	7q33	0.39	2.27	0.67	1.94	-1.88	1.216e-4	9.375e-3	Unaltered group
CELA1	12q13.13	0.33	1.77	0.51	1.96	-1.44	1.237e-4	9.460e-3	Unaltered group
PRB1	12p13.2	0.09	0.87	0.23	1.34	-0.78	1.305e-4	9.884e-3	Unaltered group
IKZF4	12q13.2	7.63	9.57	0.62	1.08	-1.94	1.307e-4	9.884e-3	Unaltered group
DCT	13q32.1	0.36	1.51	0.42	1.35	-1.16	1.353e-4	0.0102	Unaltered group
SLC38A7	16q21	7.22	8.52	0.45	1.02	-1.31	1.390e-4	0.0104	Unaltered group
GNA14	9q21.2	2.65	4.29	0.58	1.45	-1.65	1.391e-4	0.0104	Unaltered group
LINC00475	9q22.31	0.41	1.67	0.45	1.75	-1.27	1.403e-4	0.0104	Unaltered group
PIK3R1	5q13.1	8.26	10.67	0.79	1.44	-2.41	1.425e-4	0.0105	Unaltered group
SKIC3	5q15	9.72	10.44	0.26	0.88	-0.72	1.433e-4	0.0105	Unaltered group
FAM95B1	9p11.2	1.47	4.37	0.93	1.53	-2.9	1.559e-4	0.0112	Unaltered group
OIT3	10q22.1	0.41	1.78	0.5	1.55	-1.37	1.569e-4	0.0112	Unaltered group
EBF2	8p21.2	0.48	2.14	0.61	1.75	-1.67	1.641e-4	0.0115	Unaltered group
TCN1	11q12.1	0.39	2.01	0.5	2.81	-1.62	1.644e-4	0.0115	Unaltered group
CRIP3	6p21.1	0.8	2.86	0.76	2.5	-2.06	1.647e-4	0.0115	Unaltered group
RNF44	5q35.2	9.85	10.86	0.35	0.76	-1.01	1.650e-4	0.0115	Unaltered group
MTG2	20q13.33	9.41	9.89	0.16	0.71	-0.47	1.666e-4	0.0116	Unaltered group
ABHD11	7q11.23	8.76	9.58	0.3	0.8	-0.82	1.732e-4	0.012	Unaltered group
ZNF365	10q21.2	2.68	4.38	0.58	2.69	-1.7	1.848e-4	0.0127	Unaltered group
LMTK2	7q21.3	5.46	7.3	0.67	1.56	-1.84	1.931e-4	0.0131	Unaltered group
ZFP14	19q13.12	6.73	7.75	0.37	0.82	-1.02	2.077e-4	0.014	Unaltered group
ZNF765	19q13.42	6.76	8.06	0.43	0.72	-1.3	2.085e-4	0.014	Unaltered group
TMBIM4	12q14.3	10.38	11.19	0.29	0.58	-0.81	2.090e-4	0.014	Unaltered group
SLC39A2	14q11.2	0.17	1.29	0.42	1.33	-1.12	2.136e-4	0.0142	Unaltered group
NPFFR2	4q13.3	0.08	0.9	0.19	1.61	-0.82	2.180e-4	0.0144	Unaltered group
SCAI	9q33.3	7.32	8.21	0.33	0.76	-0.89	2.231e-4	0.0146	Unaltered group
PCDHGA6	5q31	2.89	5.91	1.05	1.95	-3.02	2.235e-4	0.0146	Unaltered group
OR2L13	1q44	0.09	0.81	0.22	1.29	-0.72	2.250e-4	0.0147	Unaltered group
PLVAP	19p13.11	9.98	11.33	0.47	0.87	-1.36	2.296e-4	0.0149	Unaltered group
ZNF17	19q13.43	6.38	7.02	0.24	0.63	-0.64	2.445e-4	0.0157	Unaltered group
PLEKHA6	1q32.1	2.86	5.34	0.95	2.69	-2.48	2.451e-4	0.0157	Unaltered group
SPATA4	4q34.2	0.48	2.22	0.67	1.83	-1.74	2.640e-4	0.0167	Unaltered group
FAM3D	3p14.2	0.18	0.91	0.28	0.88	-0.73	2.642e-4	0.0167	Unaltered group
CHST5	16q23.1	2.2	4.18	0.71	1.34	-1.98	2.698e-4	0.0169	Unaltered group
CCDC144NL	17p11.2	0.09	0.95	0.22	1.7	-0.86	2.716e-4	0.0169	Unaltered group
C1ORF141	1p31.3	0.21	1.37	0.33	2.23	-1.16	2.720e-4	0.0169	Unaltered group
MSH3	5q14.1	8.32	8.67	0.13	0.51	-0.35	2.823e-4	0.0174	Unaltered group
ZNF470	19q13.43	6.67	7.74	0.4	0.85	-1.08	2.881e-4	0.0176	Unaltered group
SLC5A4	22q12.3	0.38	1.68	0.51	1.66	-1.3	2.906e-4	0.0176	Unaltered group
H1-7	12q13.11	0.28	1.49	0.47	1.1	-1.21	2.969e-4	0.0179	Unaltered group
KMT2D	12q13.12	10.22	10.94	0.27	0.58	-0.73	3.054e-4	0.0183	Unaltered group
BRD8	5q31.2	9.82	10.39	0.23	0.59	-0.57	3.081e-4	0.0183	Unaltered group
ECRG4	2q12.2	0.38	2.15	0.7	1.76	-1.78	3.137e-4	0.0185	Unaltered group
GCSAML	1q44	0.09	0.78	0.22	1.26	-0.69	3.148e-4	0.0185	Unaltered group
RFX4	12q23.3	0.08	0.68	0.19	1.11	-0.6	3.204e-4	0.0187	Unaltered group
DUSP13B	10q22.2	1.21	2.48	0.44	2.18	-1.26	3.243e-4	0.0188	Unaltered group
IL7R	5p13.2	1.56	5.5	1.43	2.48	-3.95	3.289e-4	0.0191	Unaltered group
EBLN2	3p13	1.34	2.4	0.42	1.28	-1.06	3.407e-4	0.0195	Unaltered group
PCDHGA2	5q31.3	1.98	5.35	1.24	2.26	-3.37	3.435e-4	0.0195	Unaltered group
SEC24D	4q26	8.15	9.42	0.49	1.04	-1.27	3.449e-4	0.0195	Unaltered group
ZNF829	19q13.12	1.61	3.49	0.68	1.12	-1.88	3.459e-4	0.0195	Unaltered group
ATMIN	16q23.2	9.6	10.53	0.32	0.47	-0.93	3.502e-4	0.0197	Unaltered group
C2CD4B	15q22.2	1.58	2.87	0.51	1.21	-1.29	3.542e-4	0.0198	Unaltered group
ZNF461	19q13.13	5.98	6.9	0.34	0.64	-0.92	3.583e-4	0.02	Unaltered group
COQ10A	12q13.3	8.39	9.6	0.48	1.22	-1.21	3.696e-4	0.0205	Unaltered group
REG3G	2p12	0.48	2.89	0.91	3.84	-2.41	3.728e-4	0.0206	Unaltered group
LINC01000	7q32.1	8.86	9.79	0.36	0.68	-0.94	3.846e-4	0.0211	Unaltered group
ACSM5	16p12.3	1.44	3.16	0.69	1.65	-1.72	3.922e-4	0.0215	Unaltered group
GATA1	Xp11.23	0.73	2.56	0.66	3.16	-1.83	3.978e-4	0.0217	Unaltered group
LEMD3	12q14.3	8.72	9.5	0.3	0.57	-0.78	4.031e-4	0.0219	Unaltered group
PHAX	5q23.2	8.46	9.16	0.28	0.67	-0.69	4.057e-4	0.022	Unaltered group
FAM186B	12q13.12	2.84	4.98	0.79	1.3	-2.14	4.070e-4	0.022	Unaltered group
CPA3	3q24	2.92	4.95	0.83	2.37	-2.03	4.165e-4	0.0224	Unaltered group
NSG2	5q35.2	0.96	2.57	0.66	1.77	-1.61	4.170e-4	0.0224	Unaltered group
UGT1A7	2q37.1	0.49	3.42	1.2	3.73	-2.93	4.302e-4	0.0231	Unaltered group
RIN3	14q32.12	7.82	10.12	0.85	1.32	-2.3	4.368e-4	0.0234	Unaltered group
SLC48A1	12q13.11	8.53	10.65	0.76	1.04	-2.12	4.398e-4	0.0235	Unaltered group
C1RL-AS1	12p13.31	3.91	6.04	0.82	1.48	-2.12	4.443e-4	0.0236	Unaltered group
ZNF366	5q13.1	2.09	3.31	0.49	1.19	-1.21	4.497e-4	0.0237	Unaltered group
FAM178B	2q11.2	0.64	2	0.51	2.33	-1.36	4.517e-4	0.0238	Unaltered group
MCTS1	Xq24	9.76	10.11	0.14	0.54	-0.35	4.536e-4	0.0238	Unaltered group
ZNF613	19q13.41	6.06	6.9	0.33	0.63	-0.84	4.558e-4	0.0239	Unaltered group
AK5	1p31.1	0.7	2.76	0.85	2.71	-2.06	4.622e-4	0.0241	Unaltered group
RASSF8	12p12.1	8.6	10.28	0.64	1.05	-1.69	4.651e-4	0.0242	Unaltered group
HOATZ	11q23.1	0.32	1.19	0.36	0.99	-0.88	4.719e-4	0.0244	Unaltered group
CDCP2	1p32.3	0.21	1.05	0.33	1.38	-0.84	4.813e-4	0.0247	Unaltered group
PCDHB15	5q31.3	3.07	5.84	1.03	1.51	-2.77	5.027e-4	0.0254	Unaltered group
HGF	7q21.11	2.01	4.37	0.97	2.24	-2.36	5.101e-4	0.0256	Unaltered group
ZNF75A	16p13.3	8.4	9	0.25	0.67	-0.6	5.109e-4	0.0256	Unaltered group
ZNF420	19q13.12	5.91	6.83	0.38	0.96	-0.91	5.125e-4	0.0256	Unaltered group
EML1	14q32.2	7.14	9.08	0.73	1.11	-1.94	5.134e-4	0.0256	Unaltered group
SLC14A2	18q12.3	2.23	5.27	1.19	2.1	-3.04	5.179e-4	0.0257	Unaltered group
CTSG	14q12	0.09	1.05	0.23	2.03	-0.95	5.194e-4	0.0257	Unaltered group
ADGRG1	16q21	7.95	9.83	0.78	1.88	-1.88	5.217e-4	0.0257	Unaltered group
SLC25A37	8p21.2	9.88	10.6	0.3	0.88	-0.72	5.263e-4	0.0258	Unaltered group
SGPP2	2q36.1	2.1	5.31	1.31	2.79	-3.21	5.287e-4	0.0259	Unaltered group
LRRC70	5q12.1	4.27	5.01	0.31	0.76	-0.74	5.368e-4	0.0261	Unaltered group
ABI3BP	3q12.2	4.06	7.37	1.36	2.95	-3.31	5.539e-4	0.0269	Unaltered group
C5ORF47	5q35.2	0.72	1.76	0.44	1.24	-1.04	5.554e-4	0.0269	Unaltered group
RBM46	4q32.1	0.08	0.69	0.19	1.21	-0.61	5.701e-4	0.0275	Unaltered group
FNIP2	4q32.1	5.99	7.38	0.58	1.27	-1.4	5.785e-4	0.0278	Unaltered group
ABRAXAS1	4q21.23	6.67	7.23	0.24	0.77	-0.56	5.883e-4	0.0281	Unaltered group
ZNF814	19q13.43	7.68	8.66	0.4	0.83	-0.98	5.901e-4	0.0281	Unaltered group
CREBBP	16p13.3	10.1	10.64	0.23	0.51	-0.54	5.913e-4	0.0281	Unaltered group
MYOM3	1p36.11	2.01	4.07	0.84	3.24	-2.06	6.076e-4	0.0287	Unaltered group
GOLT1A	1q32.1	0.5	2.38	0.8	2.41	-1.89	6.087e-4	0.0287	Unaltered group
MDM1	12q15	7.49	8.25	0.31	0.65	-0.76	6.087e-4	0.0287	Unaltered group
GRM8	7q31.33	0.45	1.67	0.5	1.95	-1.22	6.156e-4	0.0288	Unaltered group
ATP13A5	3q29	0.09	0.64	0.23	0.78	-0.55	6.302e-4	0.0294	Unaltered group
GSTA2	6p12.2	2.82	7.64	2	4.13	-4.81	6.399e-4	0.0297	Unaltered group
ERCC4	16p13.12	7.63	8.57	0.39	0.83	-0.94	6.436e-4	0.0298	Unaltered group
ARHGAP17	16p12.1	10.05	10.68	0.27	0.66	-0.63	6.477e-4	0.0298	Unaltered group
FAM25A	10q23.2	0.16	1.27	0.4	2.1	-1.11	6.490e-4	0.0298	Unaltered group
ZNF607	19q13.1	6.06	7.38	0.52	0.83	-1.32	6.497e-4	0.0298	Unaltered group
PCDHGA7	5q31	3.27	5.94	1.1	2.2	-2.66	6.586e-4	0.0301	Unaltered group
KLKP1	19q13.33	0.9	3.12	0.96	2.66	-2.23	6.620e-4	0.0301	Unaltered group
NAPSA	19q13.33	0.74	2.5	0.71	1.26	-1.76	6.645e-4	0.0301	Unaltered group
ARHGAP44	17p12	4.28	5.69	0.61	1.63	-1.41	6.680e-4	0.0301	Unaltered group
RAD52	12p13.33	6.42	7	0.25	0.6	-0.58	6.740e-4	0.0303	Unaltered group
RPL9	4p14	8.19	9.48	0.55	1.86	-1.29	6.806e-4	0.0304	Unaltered group
ZNF208	19p12	1.36	3.45	0.9	2.27	-2.09	6.857e-4	0.0305	Unaltered group
CYSLTR2	13q14.2	3.54	5.84	1	3.02	-2.3	6.914e-4	0.0307	Unaltered group
KDR	4q12	7.72	9.62	0.75	1.13	-1.9	6.935e-4	0.0307	Unaltered group
FITM2	20q13.12	4.98	6.07	0.46	0.97	-1.09	7.037e-4	0.031	Unaltered group
C19ORF18	19q13.43	1.97	4.16	0.88	1.42	-2.18	7.054e-4	0.031	Unaltered group
DMXL1	5q23.1	8.7	9.79	0.44	0.68	-1.09	7.164e-4	0.0312	Unaltered group
ZNF133	20p11.23	8.2	8.72	0.23	0.72	-0.53	7.231e-4	0.0315	Unaltered group
ZNF471	19q13.43	6.15	7.9	0.71	1.17	-1.74	7.462e-4	0.0323	Unaltered group
C7ORF57	7p12.3	0.49	1.45	0.41	1.48	-0.96	7.792e-4	0.0335	Unaltered group
C1ORF105	1q24.3	0.4	2.13	0.76	2.1	-1.73	8.139e-4	0.0345	Unaltered group
UGT1A6	2q37.1	0.68	3.77	1.37	3.48	-3.09	8.255e-4	0.0348	Unaltered group
FRMD3	9q21.32	1.88	4.02	0.9	1.63	-2.14	8.342e-4	0.0351	Unaltered group
RIIAD1	1q21.3	0.5	2.43	0.86	2.44	-1.93	8.419e-4	0.0352	Unaltered group
TENT2	5q14.1	9.35	10.14	0.32	0.51	-0.79	8.607e-4	0.0357	Unaltered group
WWP2	16q22.1	10.32	10.9	0.25	0.61	-0.57	8.704e-4	0.036	Unaltered group
C7	5p13.1	8.54	12.37	1.58	2.45	-3.82	8.769e-4	0.0361	Unaltered group
JCAD	10p11.23	8.12	9.72	0.67	1.1	-1.6	8.822e-4	0.0362	Unaltered group
CLOCK	4q12	6.16	7.09	0.41	1.08	-0.93	8.919e-4	0.0365	Unaltered group
SPINK1	5q32	0.29	1.38	0.45	1.87	-1.09	9.015e-4	0.0368	Unaltered group
STK38L	12p11.23	8.26	9.15	0.38	0.66	-0.9	9.455e-4	0.0383	Unaltered group
WDR72	15q21.3	0.17	0.91	0.27	1.45	-0.73	9.458e-4	0.0383	Unaltered group
WNK3	Xp11.22	2.18	5.29	1.26	1.67	-3.11	9.563e-4	0.0386	Unaltered group
PRSS1	7q34	0.19	1.43	0.3	2.81	-1.24	9.663e-4	0.0388	Unaltered group
POC1B	12q21.33	7.44	8.2	0.33	0.7	-0.76	9.679e-4	0.0388	Unaltered group
RAB21	12q21.1	10.06	10.8	0.32	0.56	-0.75	9.728e-4	0.039	Unaltered group
WFDC13	20q13.11	0.12	0.83	0.28	1.34	-0.72	9.805e-4	0.0392	Unaltered group
LDLRAP1	1p36.11	9.43	9.9	0.21	0.63	-0.47	9.842e-4	0.0392	Unaltered group
CLN3	16p12.1	9.89	10.65	0.34	0.67	-0.76	9.953e-4	0.0393	Unaltered group
C1QTNF8	16p13.3	0.43	2.03	0.6	3.15	-1.61	9.965e-4	0.0393	Unaltered group
C4ORF46	4q32.1	7.58	7.91	0.1	0.73	-0.33	9.966e-4	0.0393	Unaltered group
SYNPO2L	10q22.2	0.71	2.14	0.65	1.81	-1.43	1.029e-3	0.0403	Unaltered group
ZNF615	19q13.41	6.44	7.76	0.53	0.65	-1.32	1.029e-3	0.0403	Unaltered group
ZNF268	12q24.33	7.75	8.35	0.27	0.61	-0.61	1.046e-3	0.0409	Unaltered group
UBE2Q2P1	15q25.2	2.08	3.88	0.77	1.28	-1.8	1.058e-3	0.0413	Unaltered group
NPAS3	14q13.1	2.25	5.61	1.39	1.81	-3.36	1.071e-3	0.0415	Unaltered group
ZNF606	19q13.43	7.46	8.26	0.36	0.78	-0.8	1.072e-3	0.0415	Unaltered group
PAX5	9p13.2	0.09	0.61	0.22	0.92	-0.52	1.073e-3	0.0415	Unaltered group
NFATC2	20q13.2	1.03	2.67	0.74	1.65	-1.63	1.075e-3	0.0415	Unaltered group
ANKRD36BP1	1q24.2	3.15	4.08	0.42	1.45	-0.93	1.093e-3	0.0419	Unaltered group
ZNF566	19q13.12	6.79	7.92	0.47	0.64	-1.12	1.094e-3	0.0419	Unaltered group
CEACAM16	19q13.31-q13.32	0.25	1.16	0.41	1.2	-0.9	1.096e-3	0.0419	Unaltered group
USP53	4q26	6.13	8.28	0.93	1.54	-2.15	1.101e-3	0.042	Unaltered group
ZKSCAN1	7q22.1	7.43	8.9	0.62	0.88	-1.47	1.123e-3	0.0426	Unaltered group
MAEL	1q24.1	0.23	1.11	0.39	1.47	-0.88	1.139e-3	0.043	Unaltered group
ASAH1	8p22	10.75	11.35	0.25	1.09	-0.6	1.141e-3	0.043	Unaltered group
LINC01366	5q35.1	0.65	1.93	0.59	1.43	-1.28	1.149e-3	0.0431	Unaltered group
PWWP3B	Xq22.3	0.95	2.99	0.93	2.95	-2.04	1.150e-3	0.0431	Unaltered group
HECW2	2q32.3	5.62	6.84	0.53	0.79	-1.22	1.155e-3	0.0432	Unaltered group
SLC22A5	5q31.1	7.6	8.78	0.52	0.9	-1.18	1.187e-3	0.0441	Unaltered group
ZNF480	19q13.41	7.84	8.67	0.36	0.57	-0.82	1.205e-3	0.0446	Unaltered group
MON2	12q14.1	9.36	10.24	0.37	0.49	-0.88	1.212e-3	0.0448	Unaltered group
MYLK3	16q11.2	2.26	4.47	1.03	2.44	-2.22	1.219e-3	0.0448	Unaltered group
SYT4	18q12.3	0.12	0.97	0.28	1.86	-0.86	1.222e-3	0.0448	Unaltered group
SQSTM1	5q35.3	13.71	14.45	0.34	0.95	-0.74	1.253e-3	0.0454	Unaltered group
TSR2	Xp11.22	10.17	11.08	0.42	1.01	-0.91	1.274e-3	0.0461	Unaltered group
PRRC1	5q23.2	10.04	10.93	0.39	0.6	-0.89	1.278e-3	0.0462	Unaltered group
DPY19L3	19q13.11	6.09	7.53	0.64	1.04	-1.44	1.287e-3	0.0464	Unaltered group
FGF7	15q21.2	3.95	5.49	0.69	1.19	-1.54	1.293e-3	0.0465	Unaltered group
MIOS	7p21.3	8.28	8.95	0.31	0.98	-0.67	1.301e-3	0.0465	Unaltered group
MSC	8q13.3	4.35	6.82	1.15	2.72	-2.47	1.305e-3	0.0466	Unaltered group
DNAI1	9p13.3	0.46	1.63	0.55	1.65	-1.17	1.359e-3	0.0483	Unaltered group
RNF39	6p22.1	2.66	6	1.5	2.51	-3.34	1.361e-3	0.0483	Unaltered group
GEMIN8	Xp22.2	8.2	8.92	0.33	0.72	-0.72	1.366e-3	0.0483	Unaltered group
RAB40AL	Xq22.1	2.11	2.92	0.38	1.15	-0.81	1.412e-3	0.0493	Unaltered group
ZNF429	19p12	5.38	7.07	0.73	0.95	-1.69	1.427e-3	0.0496	Unaltered group
PCDHGB4	5q31	3.93	6.86	1.34	2.3	-2.93	1.444e-3	0.05	Unaltered group
